# Supplementary material for: Releasing a preprint is associated with more attention and citations for the peer-reviewed article
Source: bioRxiv or medRxiv preprint supplement (doi:10.1101/699652), 2019-10-15
Supplement: Supplementary file [file media-1.pdf]

Supplemental Figures for:

## Releasing a preprint is associated with more attention and citations for the peer-reviewed article

Darwin Y. Fu<sup>1</sup> and Jacob J. Hughey<sup>1,2,\*</sup>

<sup>1</sup>Department of Biomedical Informatics, Vanderbilt University Medical Center, Nashville, Tennessee;

<sup>2</sup>Department of Biological Sciences, Vanderbilt University, Nashville, Tennessee

\*To whom all correspondence should be addressed: [jakejhughey@gmail.com](mailto:jakejhughey@gmail.com)

Figure S1

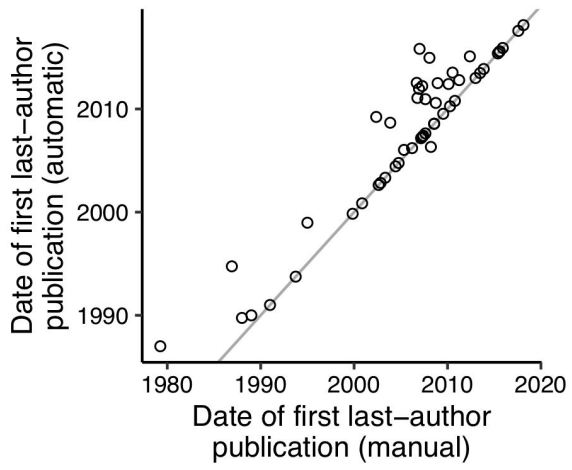

Accuracy of automatically inferring last-author publications from names and affiliations in PubMed. Each point represents one of the 100 randomly selected articles. The gray line represents  $y = x$ . For details, see Table S2.

Figure S2

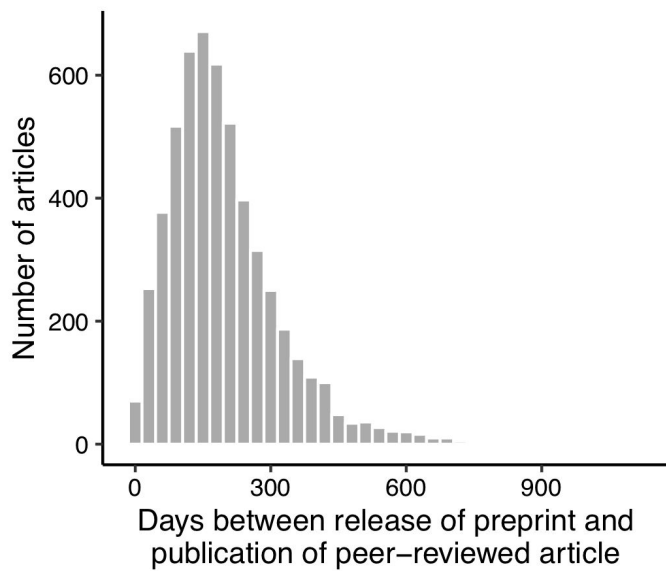

Histogram of the number of days by which release of the preprint preceded publication of the peer-reviewed article, including articles from all journals.

Figure S3

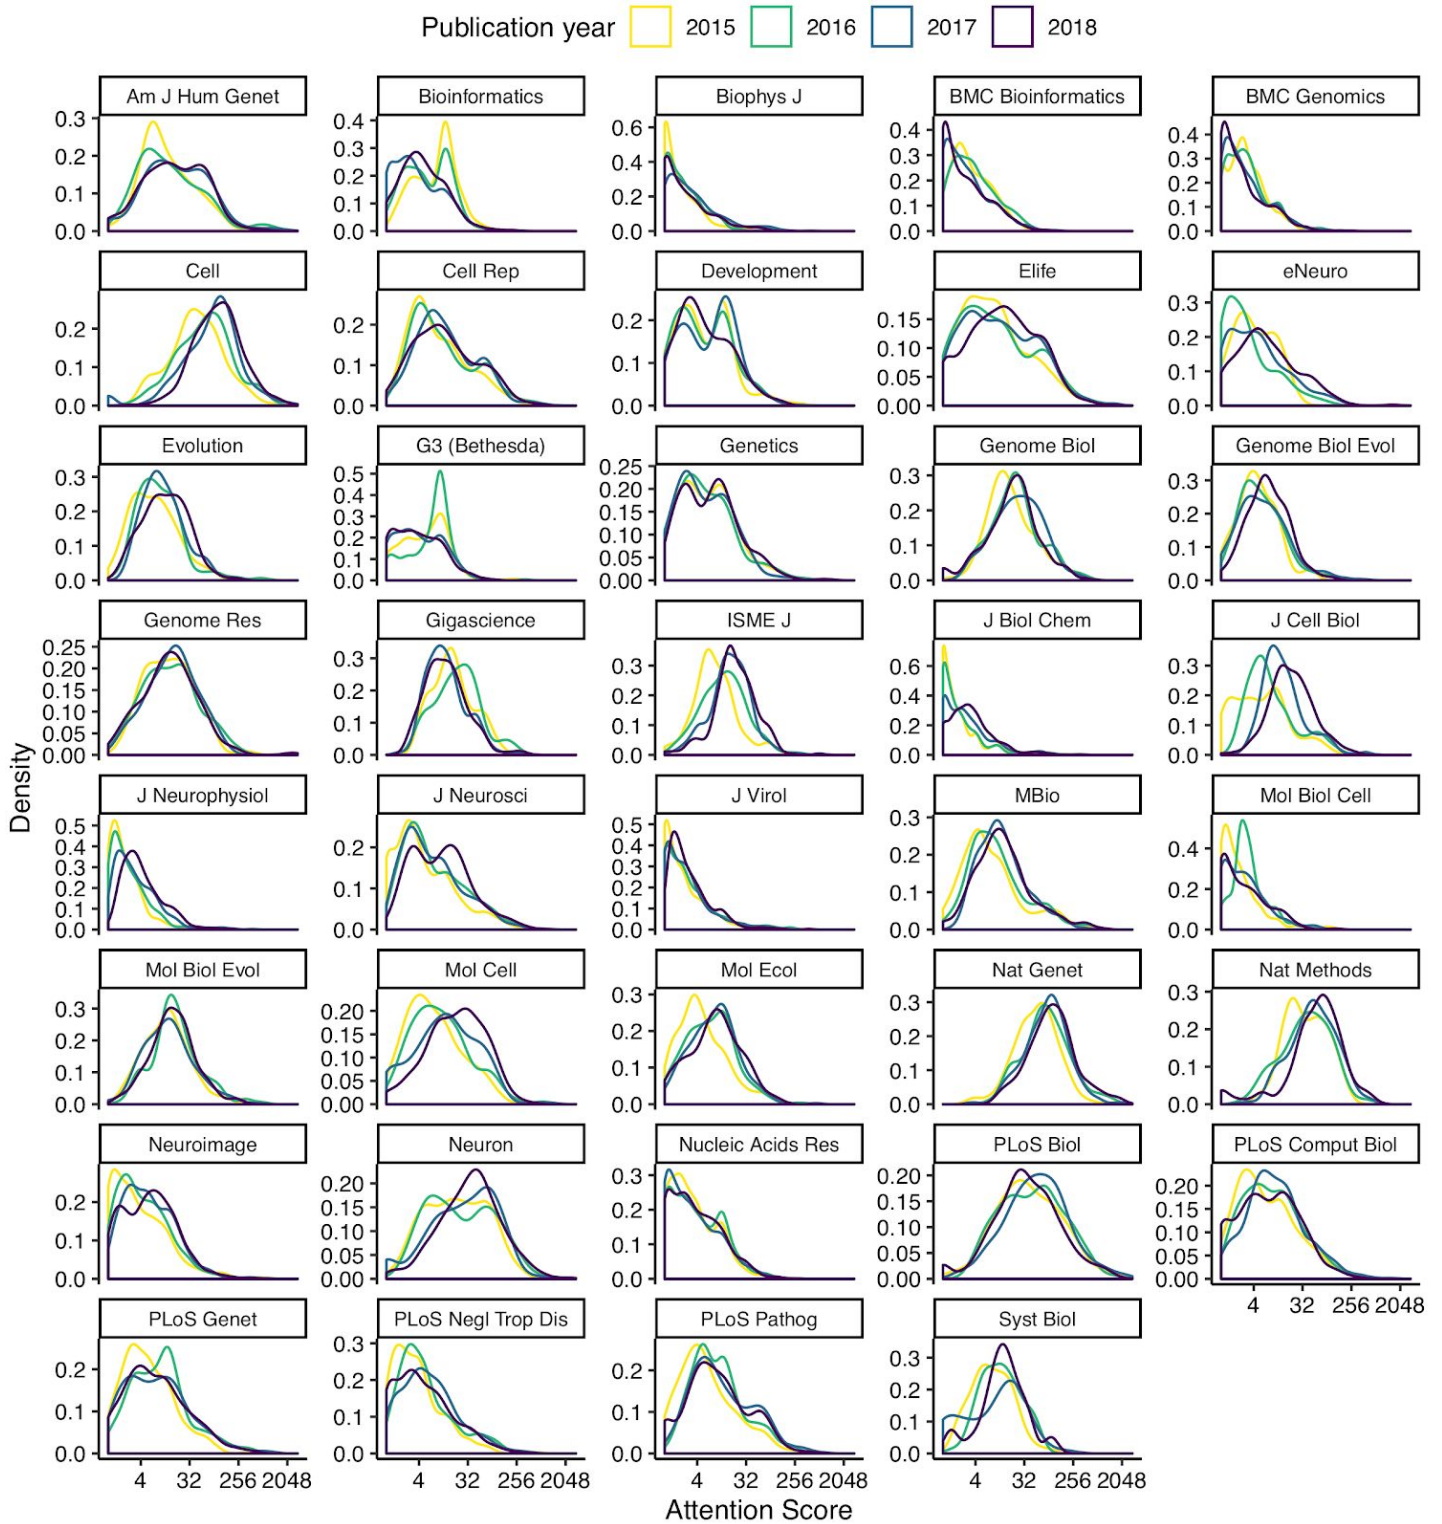

Kernel density estimates of Attention Score (with a pseudocount of 1) for articles in each journal and each publication year. Estimates were computed using the default settings of the `geom_density` function of the `ggplot2` R package.

Figure S4

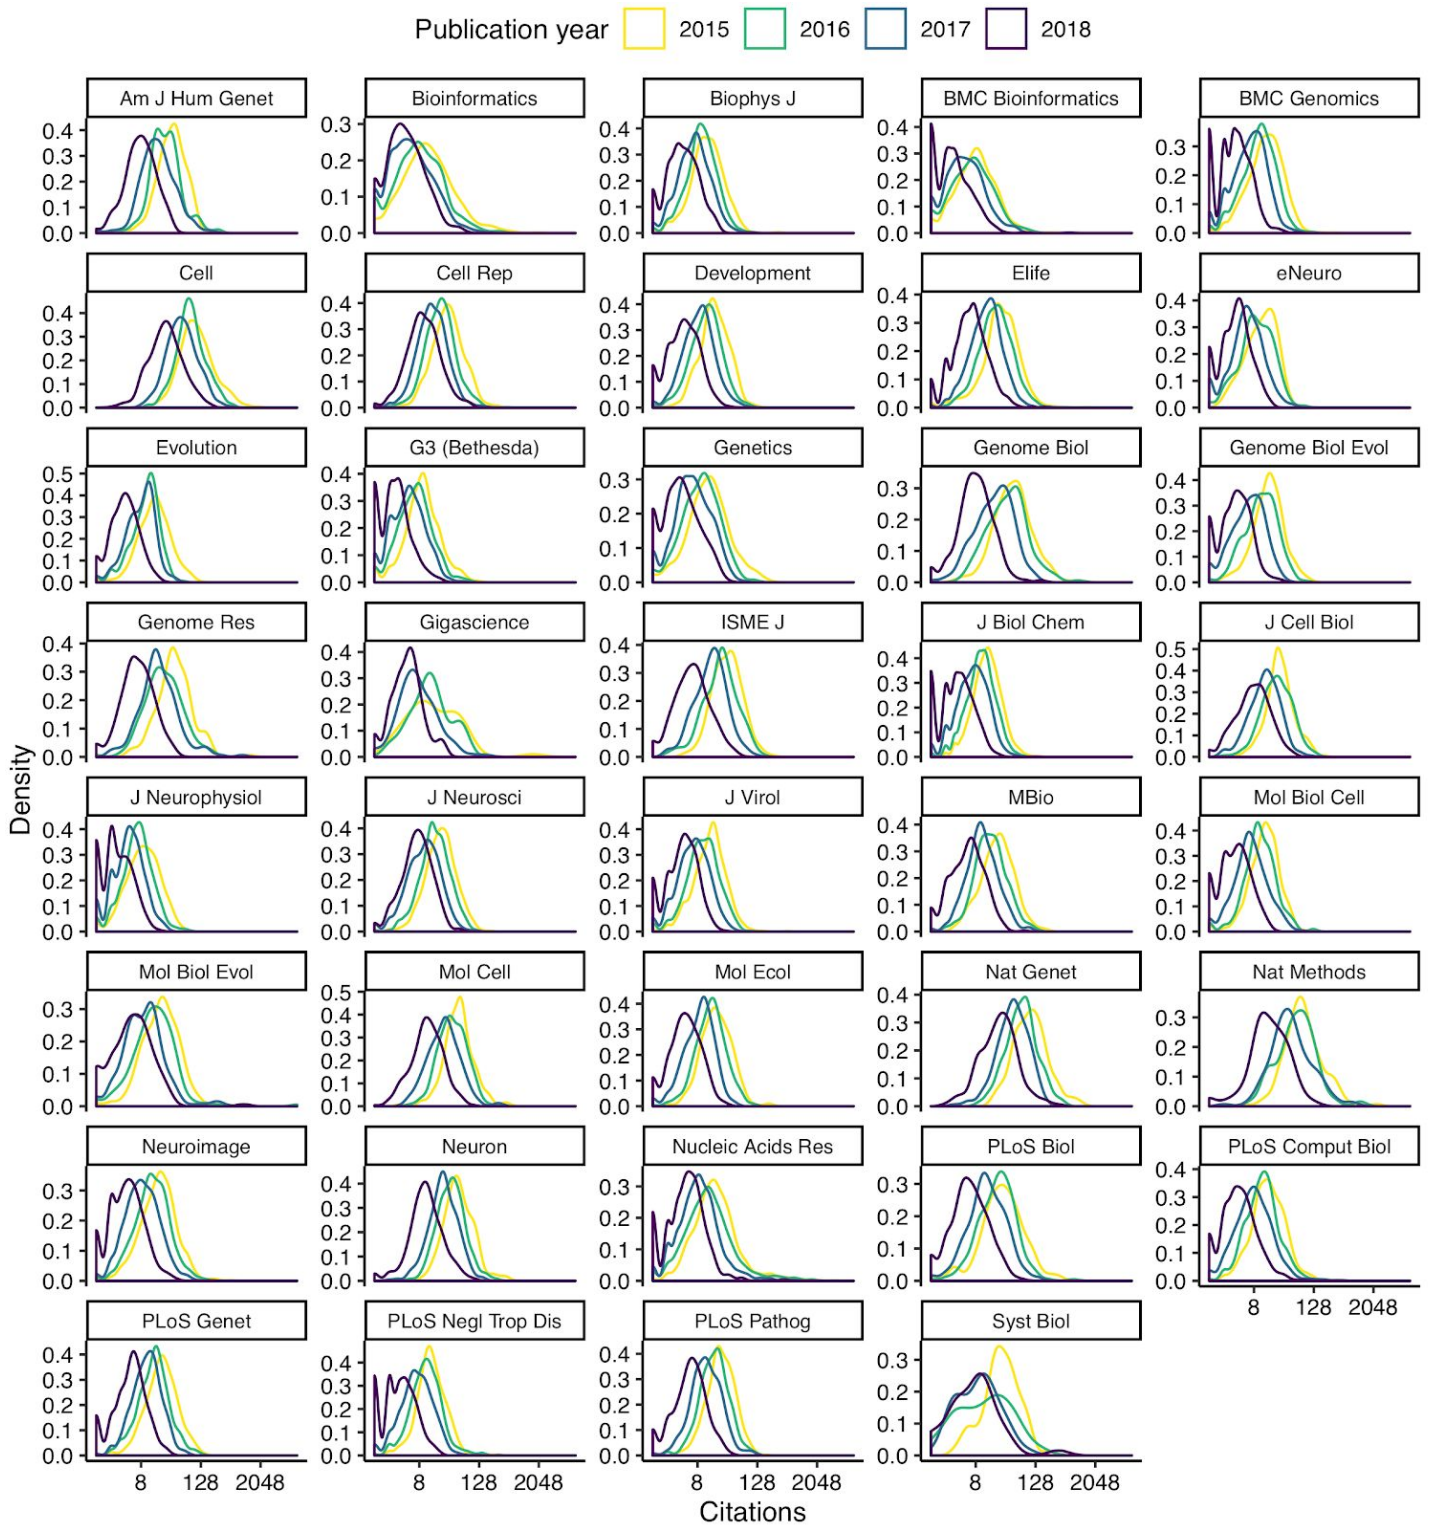

Kernel density estimates of number of citations (with a pseudocount of 1) for articles in each journal and each publication year. Estimates were computed using the default settings of the `geom_density` function of the `ggplot2` R package.

Figure S5

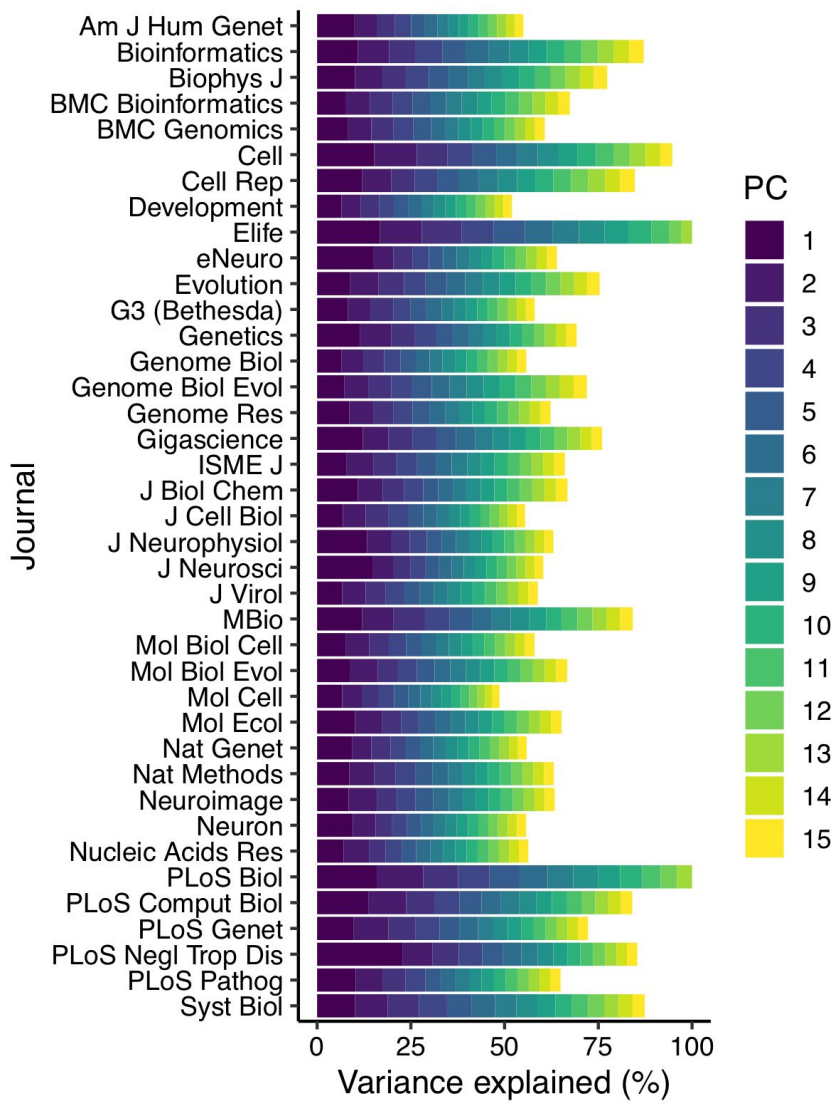

Percentage of variance in MeSH term assignment explained by the top 15 principal components for each journal.



Figure S6

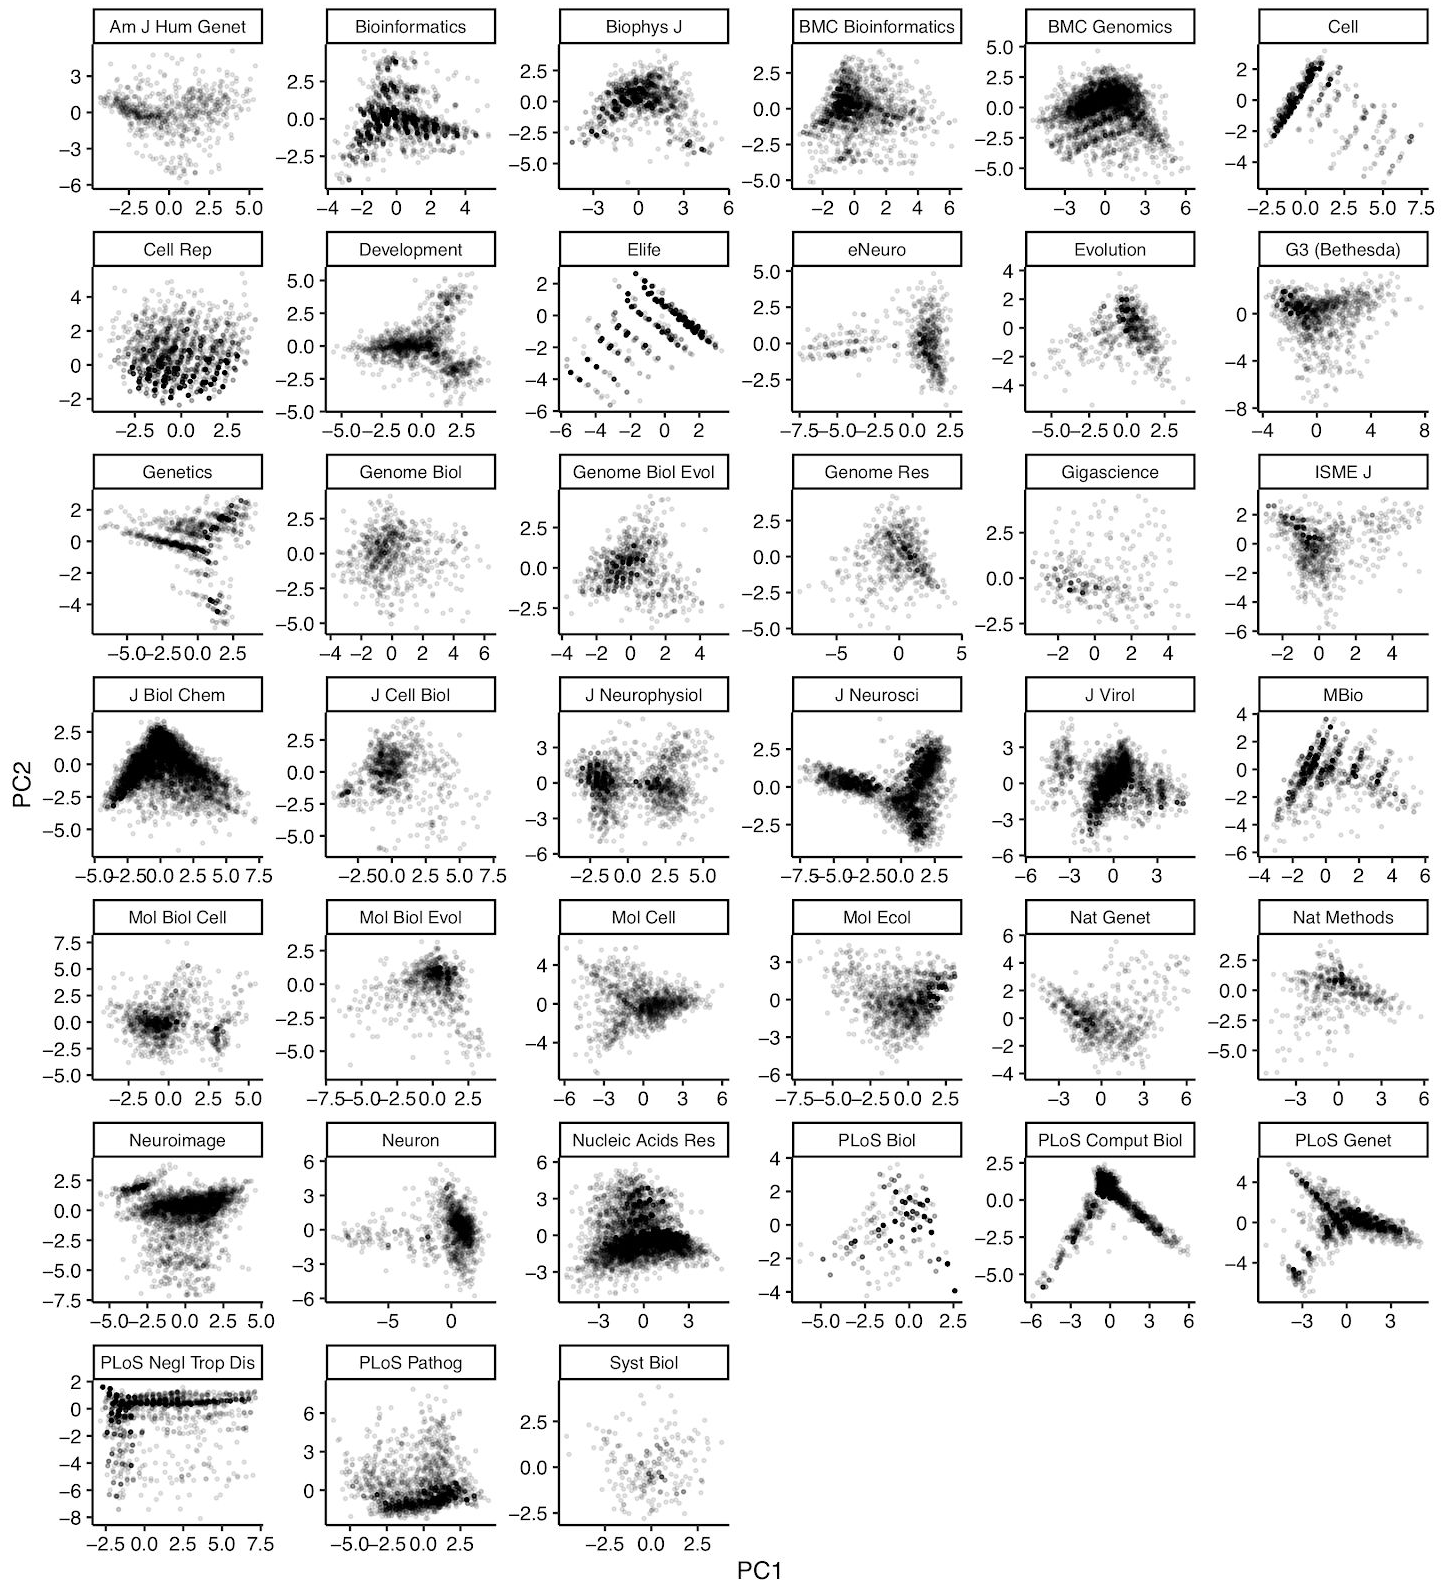

Scores for the top two principal components of MeSH term assignments for each journal. Each point represents an article.

Figure S7

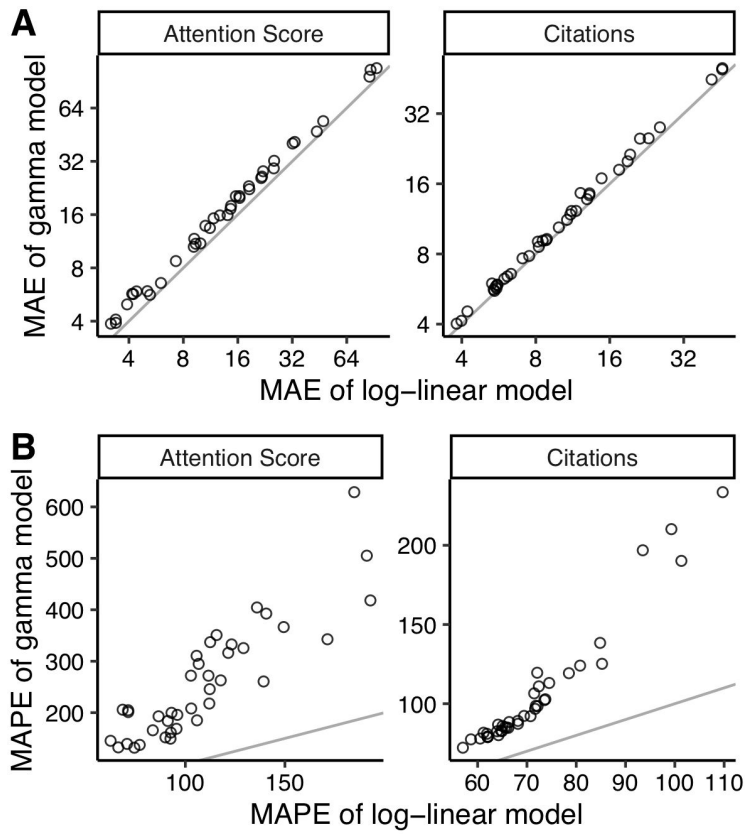

Comparing mean absolute error (MAE) and mean absolute percentage error (MAPE) of Gamma and log-linear regression models for each metric. Each point represents a journal. The gray line indicates  $y = x$ .



Figure S8

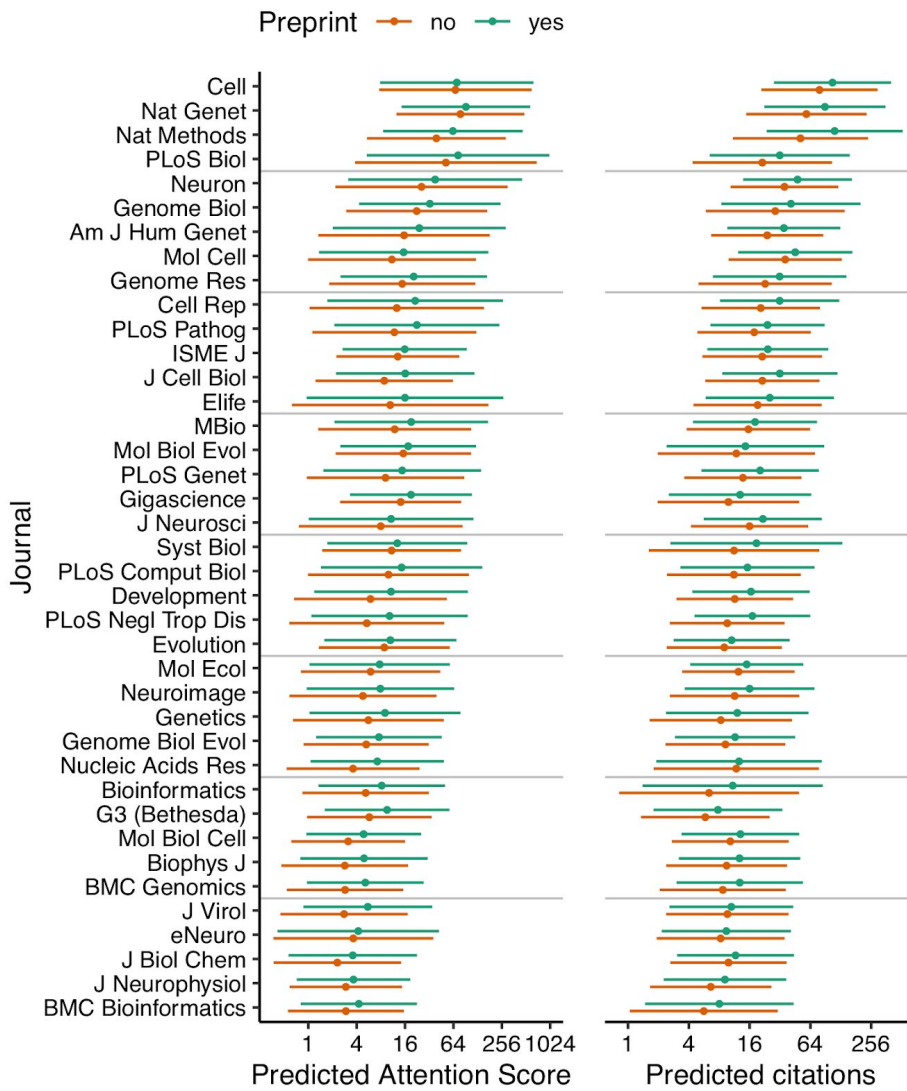

Absolute effect size of having a preprint, by metric and journal. The plots were generated identically to Fig. 1, except they show 95% prediction intervals instead of 95% confidence intervals. Confidence intervals represent uncertainty in the population mean, whereas prediction intervals represent uncertainty in an individual observation. Thus, prediction intervals show the article-to-article variation in Attention Score and citations, even when all variables in the model are fixed.

Figure S9

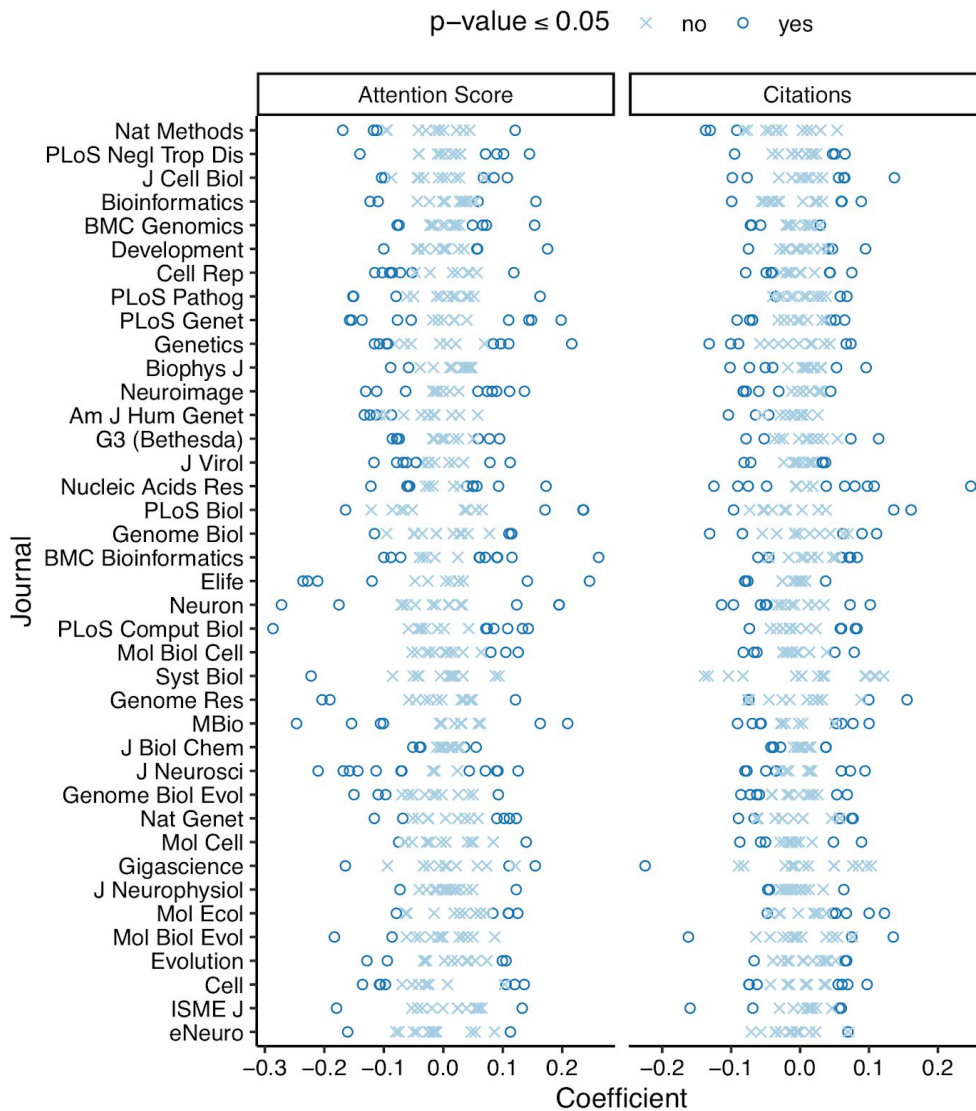

Associations of MeSH term PCs with Attention Score and citations in each journal, based on model coefficients from log-linear regression. P-values are not adjusted for multiple testing.

Figure S10

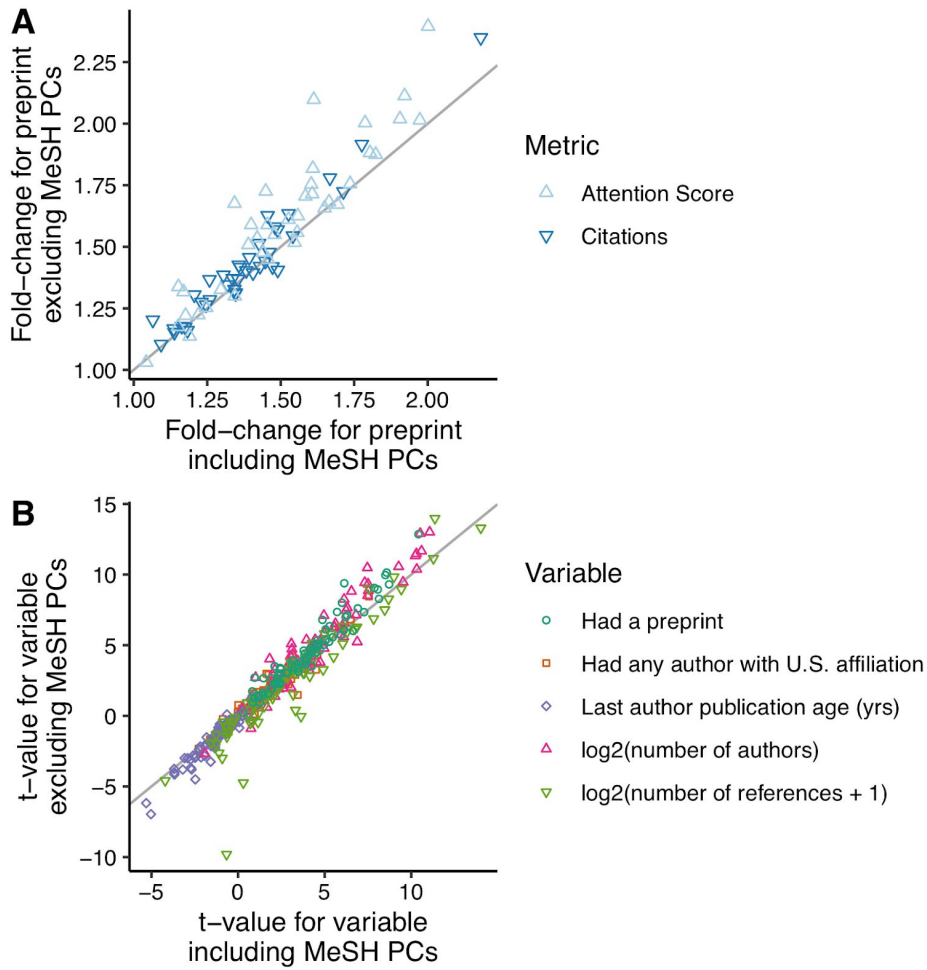

Comparing model fits with and without MeSH term PCs, in terms of **(A)** fold-change (i.e., exponentiated coefficient) for preprint status and **(B)** t-value for each of five variables. Each point represents a journal-metric pair.
